# Supplementary material for: Provision of Bilingual Dispensing Labels to Non-Native English Speakers: An Exploratory Study
Source: Pharmacy (Basel). 2019 Mar 25;7(1):32. doi: 10.3390/pharmacy7010032 (PMC6473342; doi:10.3390/pharmacy7010032)
Supplement: Supplementary file 1 [file pharmacy-07-00032-s001.zip › pharmacy-452751-final-supple/complete data summary.xlsx]

## Sheet: Baseline Results
Baseline Results
Denominator for %'s	151
What is your first language?
Arabic	51 (33.8%)
Bengali	31 (20.5%)
Gujarati	14 (9.3%)
Hindi	14 (9.3%)
Polish	9 (6.0%)
Punjabi	18 (11.9%)
Somali	4 (2.6%)
Tamil	10 (6.6%)
Not answered	0 (0.0%)
1. What is your gender:
Male	58 (38.4%)
Female	92 (60.9%)
Not answered	1 (0.7%)
2. How old are you:
18-25	7 (4.6%)
26-40	40 (26.5%)
41-60	37 (24.5%)
Over 60	64 (42.4%)
Not answered	3 (2.0%)
3. How long have you lived in the UK?
Less than 1 year	8 (5.3%)
1-5 years	22 (14.6%)
6-10 years	29 (19.2%)
More than 10 years	89 (58.9%)
Not answered	3 (2.0%)
4. How good is your understanding of written English?
Very good	15 (9.9%)
Good	20 (13.2%)
Fair	59 (39.1%)
Poor	37 (24.5%)
Very poor	20 (13.2%)
Not answered	0 (0.0%)
5. How good is your understanding of spoken English?
Very good	19 (12.6%)
Good	16 (10.6%)
Fair	70 (46.4%)
Poor	32 (21.2%)
Very poor	14 (9.3%)
Not answered	0 (0.0%)
6. Do you read the information on the labels of your medicines (example shown below)?
Always	32 (21.2%)
Most of the time	23 (15.2%)
Sometimes	56 (37.1%)
Rarely	23 (15.2%)
Never	17 (11.3%)
Not answered	0 (0.0%)
7. How often do you understand this information?
Always	23 (15.2%)
Most of the time	34 (22.5%)
Sometimes	62 (41.1%)
Rarely	14 (9.3%)
Never	17 (11.3%)
Not answered	1 (0.7%)
8. Does someone else help you to understand this information?
Always	29 (19.2%)
Most of the time	30 (19.9%)
Sometimes	58 (38.4%)
Rarely	22 (14.6%)
Never	12 (7.9%)
Not answered	0 (0.0%)
9. If someone helps you with this information, who would this be? (more than one option can be selected)
The pharmacy staff	82
The surgery staff	10
A friend or relative	99
Others	4
10. How often would you say that you take the right amount of your medicines (for example, the right number of puffs from the inhaler, the right volume of liquid from a bottle or the right number of tablets) and at the right time, as specified by the label?
Always	44 (29.1%)
Most of the time	44 (29.1%)
Sometimes	41 (27.2%)
Rarely	15 (9.9%)
Never	1 (0.7%)
I am not sure	4 (2.6%)
Not answered	2 (1.3%)
11. If there are occasions where you take your medicines in a way other than that specified on the label, what is the reason for this?
Choose not to	9 (6.0%)
Not sure how to	53 (35.1%)
I always follow GP instructions	33 (21.9%)
I forget	45 (29.8%)
Other reasons	8 (5.3%)
Not answered	3 (2.0%)
Is medication:
Chronic	66 (43.7%)
Acute	55 (36.4%)
Both	30 (19.9%)
Not answered	0 (0.0%)
Is medication:
Repeated	87 (57.6%)
New	43 (28.5%)
Both	16 (10.6%)
Not sure	5 (3.3%)
Not answered	0 (0.0%)
Was the patient enrolled onto any other pharmacy services? If so, which one(s)?
No	108 (71.5%)
Not sure	31 (20.5%)
MUR	5 (3.3%)
Dossette	3 (2.0%)
Supervised methadone	3 (2.0%)
Minor ailments	1 (0.7%)
NMS	1 (0.7%)

## Sheet: Follow Up Results
Follow Up Results
1. Have you read the translated information on your medicines labels (example shown below)?
Denominator for %'s	130
Yes	128 (98.5%)
No	2 (1.5%)
Not answered	0 (0.0%)
2. Was the translation easy to understand?
Denominator for %'s	128
Always	67 (52.3%)
Most of the time	47 (36.7%)
Sometimes	13 (10.2%)
Rarely	0 (0.0%)
Never	0 (0.0%)
Not answered	1 (0.8%)
3. Did you need someone else to help you understand this information?
Denominator for %'s	128
Yes	32 (25.0%)
No	96 (75.0%)
Not answered	0 (0.0%)
Subset of patients who required support from an interpreter “always”, “most of the time” or “sometimes” at baseline, had a follow up and read their translated instructions
3. Did you need someone else to help you understand this information?
Denominator for %'s	103
Yes	26 (25.2%)
No	77 (74.8%)
Not answered	0 (0.0%)
4. If someone helped you with the translated information, please specify who helped you ?
A friend or relative	14
The pharmacy staff	19
GP staff	1
others	2
5. Do you think the translated information helped you to use the right amount of medicine, as specified on the medication label (for example, the right number of puffs from the inhaler, the right volume of liquid from a bottle or the right number of tablets)?
Denominator for %'s	128
Yes	106 (82.8%)
No	7 (5.5%)
I am not sure	15 (11.7%)
Not answered	0 (0.0%)
6. Do you think the translated information helped you to take your medicines at the right time as specified on the label?
Denominator for %'s	128
Yes	105 (82.0%)
No	10 (7.8%)
I am not sure	13 (10.2%)
Not answered	0 (0.0%)
Subset of patients who only received "repeated" medicines, not "new", "both" or "not sure"
7. After reading the translated information, did you notice you were taking your medicines in a way other than that specified on the medication label?
Denominator for %'s	74
Yes	46 (62.2%)
No	22 (29.7%)
I am not sure	6 (8.1%)
Not answered	0 (0.0%)
Subset of patients who only received "repeated" medicines, not "new", "both" or "not sure" and said they take the right dose of their medicine at the right time “Always” or “Most of the time” at baseline
7. After reading the translated information, did you notice you were taking your medicines in a way other than that specified on the medication label?
Denominator for %'s	36
Yes	13 (36.1%)
No	18 (50.0%)
I am not sure	5 (13.9%)
Not answered	0 (0.0%)
8. Did you visit this pharmacy only because it provides translated labels?
Denominator for %'s	128
Yes	40 (31.3%)
No	85 (66.4%)
Not answered	3 (2.3%)
9. Would you prefer to receive translated labels on a regular basis?
Denominator for %'s	128
Yes	101 (78.9%)
Makes no difference to me	24 (18.8%)
No	1 (0.8%)
Not answered	2 (1.6%)
10. Would the availability of translated labels influence which pharmacy you use?
Denominator for %'s	128
Always	57 (44.5%)
Most of the time	27 (21.1%)
Sometimes	28 (21.9%)
Rarely	10 (7.8%)
Never	5 (3.9%)
Not answered	1 (0.8%)
